# Supplementary material for: DNA Based Vaccine Expressing SARS-CoV-2 Spike-CD40L Fusion Protein Confers Protection Against Challenge in a Syrian Hamster Model
Source: PubMed Central journal article supplement (PMC8789660; doi:10.3389/fimmu.2021.785349), 2022-01-12
Supplement: DataSheet_1.pdf [file DataSheet_1.pdf]

*Supplementary Material*

1 Supplementary Data

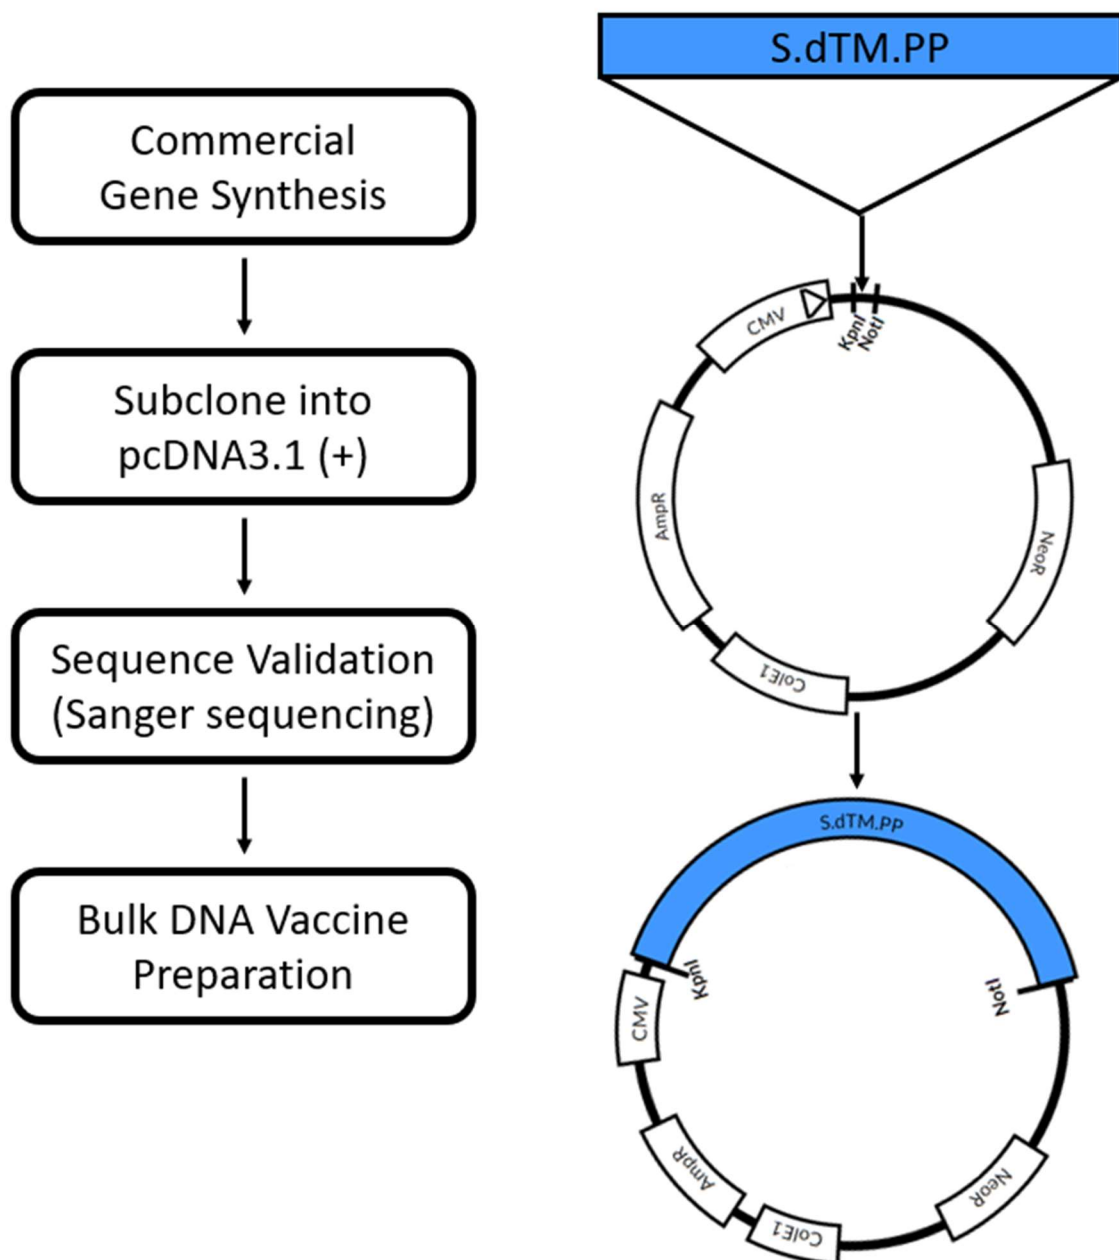

**Supplemental Figure 1: DNA Vaccine Construction.** Commercially synthesized DNA sequences were subcloned into pcDNA3.1 (+) using KpnI and NotI restriction sites. DNA vaccines were sequenced validated before bulk preparation.

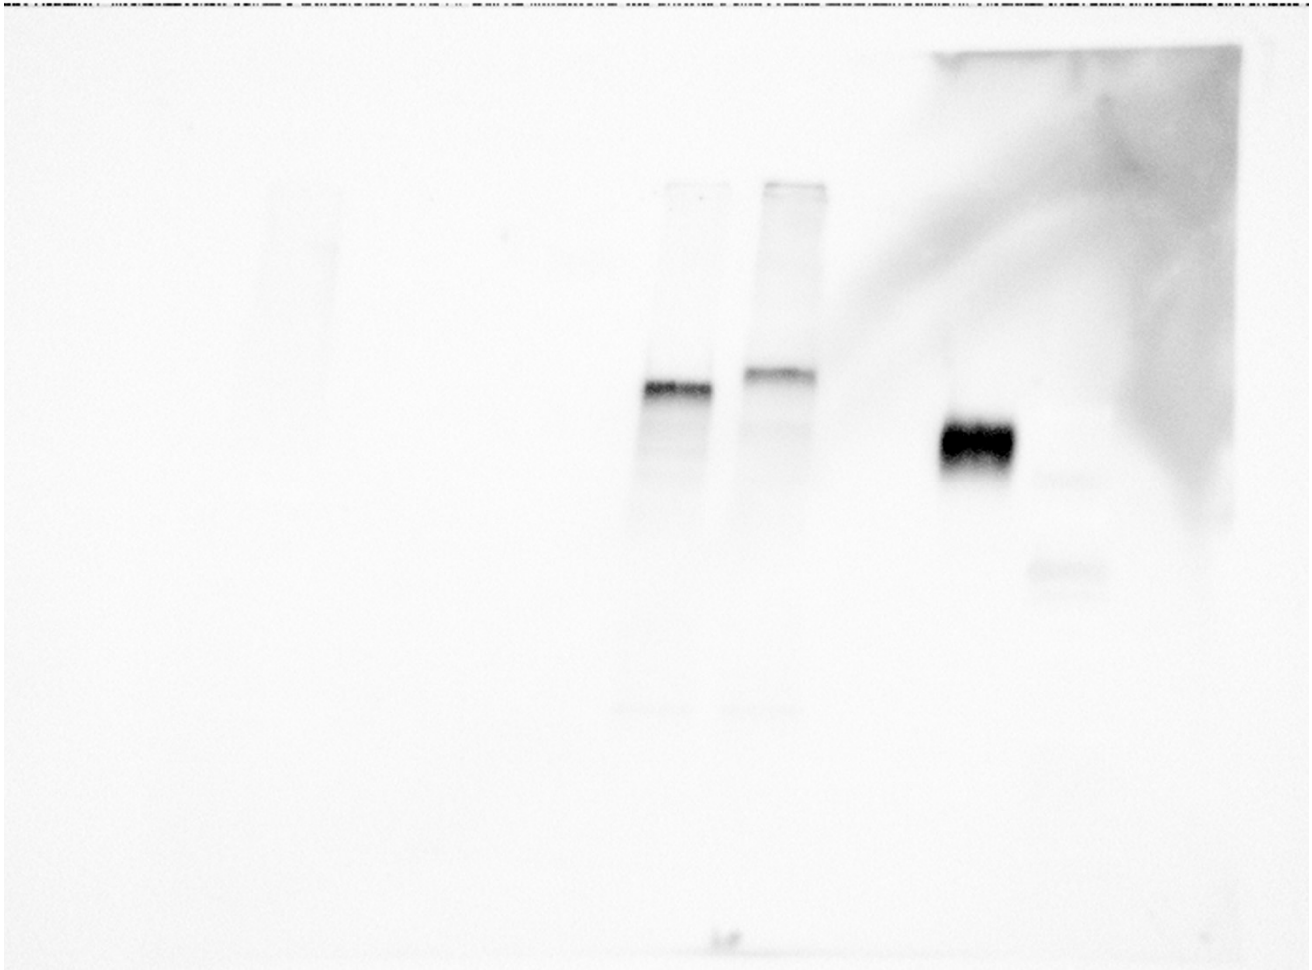

**Supplemental Figure 2: Spike Western Blot Images.** SARS-CoV-2 (2019-nCoV) Spike Antibody, Rabbit PAb, Antigen Affinity Purified (Cat: 40591-T62, Sino Biologicals). SARS-CoV-2 (2019-nCoV) Spike S1+S2 ECD-His recombinant protein (Sino Biological) used as a positive control. Chemiluminescence image of entire membrane.

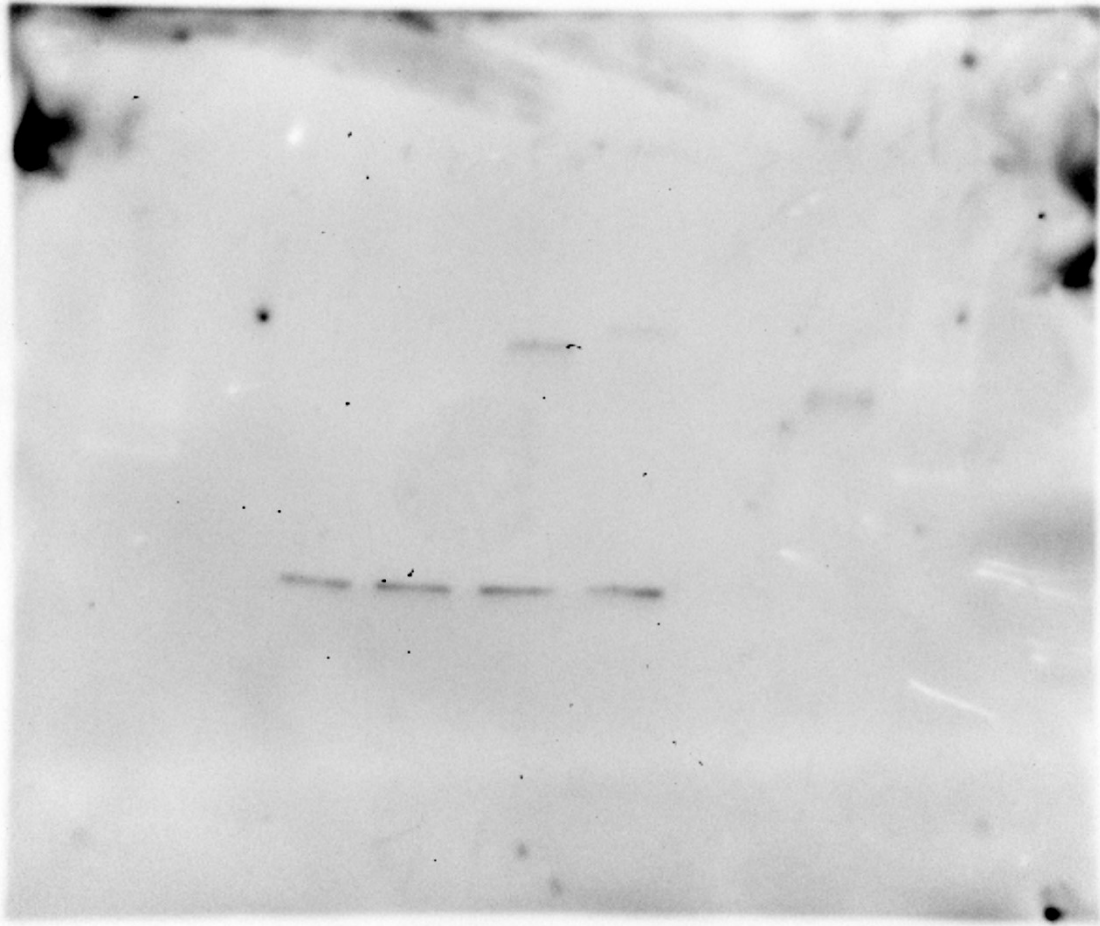

**Supplemental Figure 3: B-actin Western Blot Image.**  $\beta$ -Actin Antibody (Cat: 4967, Cell Signaling). Chemiluminescence image of entire membrane.

**Supplemental Table 1. DNA Vaccines against SARS-CoV-2 in clinical trials.** S – Spike. N – Nucleoprotein. ID – Intradermal. IM – Intramuscular. EP- Electroporation. <https://clinicaltrials.gov/> accessed November 16 2021.

| Vaccine Name                 | Vaccine Antigen    | Administration Route (Doses) | Administration Device       | Clinical Trial Phase | Clinical Trial Identifier |
|------------------------------|--------------------|------------------------------|-----------------------------|----------------------|---------------------------|
| INO-4800                     | S                  | ID (2)                       | EP                          | II/III               | NCT04642638               |
| AG0302-COVID19               | S                  | IM (2)                       | N/A                         | II/III               | NCT04655625               |
| GX-19N                       | S and N            | IM (2)                       | EP                          | II/III               | NCT05067946               |
| VB10.2129 (C1) and VB10.2210 | S or multi-antigen | IM (1 or 2)                  | N/A                         | I/II                 | NCT05069623               |
| Covigenix VAX-001            | S                  | IM (2)                       | N/A                         | I/II                 | NCT04591184               |
| GLS-5310                     | S                  | ID (2)                       | N/A                         | I/II                 | NCT04673149               |
| GX-19                        | S                  | IM (2)                       | EP or needle-free injection | I/II                 | NCT04445389               |
| COVID-eVax                   | S                  | IM (1 or 2)                  | EP                          | I/II                 | NCT04788459               |
| AG0301-COVID19               | S                  | IM (or 2)                    | N/A                         | I/II                 | NCT04463472               |
| CORVAX-12                    | S                  | IM (1)                       | EP                          | I                    | NCT04627675               |
| COVIGEN                      | S                  | IM/ID (2)                    | needle-free injection       | I                    | NCT04742842               |
| COVIDITY                     | S and N            | IM/ID (2)                    | needle-free injection       | I                    | NCT05047445               |
